# Supplementary material
Source: PubMed Central journal article supplement (PMC4301737)
Supplement: NIHMS115048-supplement-01.pdf [file NIHMS115048-supplement-01.pdf]

**Table S1.** Sequences of primers for this study

| Primer name                                         | Primer sequence (5'-3')            |
|-----------------------------------------------------|------------------------------------|
| <i>Expression and purification</i>                  |                                    |
| <i>Bpe</i> GReg Xa top                              | ATCGAGGGAAGGTTGAAGCCTTCGCCTGAAATC  |
| Histidine Xa top                                    | CACCACCACCACCACCACATCGAGGGAAGG     |
| NdeI histidine top                                  | AACATATGCACCACCACCACCACCAC         |
| <i>Bpe</i> GReg BamHI bot                           | AAGGATCCCTAGTGCTGGCCGGACTG         |
| <i>Av</i> GReg NdeI top                             | AACATATGTCTGAACAGAGCAGGATC         |
| <i>Av</i> GReg HindIII bot                          | AAAAGCTTGCCATCCAGCTTCCGGGC         |
| <i>Cv</i> GReg NdeI top                             | AACATATGAAACAGACCGATCAAAC          |
| <i>Cv</i> GReg NotI bot                             | AAGCGGCCGCGCGCCCGACTACCGGCGC       |
| <i>Expression in S. typhimurium</i>                 |                                    |
| <i>Bpe</i> GReg SacI top                            | AAGAGCTCTTGAAGCCTTCGCCTGAAATC      |
| <i>Bpe</i> GReg BamHI bot                           | AAGGATCCCTAGTGCTGGCCGGACTG         |
| <i>Av</i> GReg SacI top                             | AAGAGCTCATGTCTGAACAGAGCAGGATC      |
| <i>Av</i> GReg BamHI bot                            | AAGGATCCTCAGCCATCCAGCTTCCG         |
| <i>Cv</i> GReg EcoRI top                            | AAGAATTCATGAAACAGACCGATCAAACC      |
| <i>Cv</i> GReg SacI bot                             | AAGAGCTCCTAGCGCCCGACTACCGG         |
| <i>Site-directed mutagenesis</i>                    |                                    |
| <i>Bpe</i> GReg H225A-F                             | CGGCCTGTGGTTCATCGCCAAGGCGGCGCACGCC |
| <i>Bpe</i> GReg H225A-R                             | GGCGTGCGCCGCCTTGGCGATGAACCACAGGCCG |
| <i>Construction of B. pertussis knockout strain</i> |                                    |
| <i>Bpe</i> GReg 289-888 HindIII top                 | AAAAGCTTGAAGTGCACGCGCGCATC         |
| <i>Bpe</i> GReg 289-888 BamHI bot                   | AAGGATCCGCGCCCCGACTCCAGGTTG        |
| <i>Bpe</i> GReg upstream region-F                   | CTGTGGACCACCCCCCTG                 |
| pFUS2-R                                             | GAGAATTCGGTTACGCAA                 |

## Supplementary Figure Legends

**Figure S1.** Multiple alignments of the globin-coupled diguanylate cyclases. The globin domain extends from the Z-helix to the H-helix, and the DGC domain from the  $\beta 0$  strand to  $\beta 5$  strand. The secondary structures of the GCS globin domain of HemAT-*Bs* and the DGC domain of PleD have been included for reference. In addition to the B10 tyrosine ( $\psi$ ) and proximal histidine ( $\dagger$ ) of the globin domain, the active, *A*, and inhibitory, *I*, sites of the DGC domain are indicated below the sequences. The three GCSs beginning with EAK or EAJ are from environmental samples taken from the Sargasso Sea. Two GCS sequences that do not possess the DGC motif originate from unfinished whole-genome shotgun sequences from TIGR (*Shigella dysenteriae*) and JGI (*Shewanella baltica*). The *Shigella flexneri* sequence comes from the completed genome. To simplify the presentation of sequences, the portions of the reference sequences, HemAT-*Bs* and PleD, that are unrelated to the globin or DGC domains were replaced with an asterisk (\*). Gaps and ends of sequences are indicated with a hyphen (-) and period (.), respectively. The illustrated color code represents a 90% consensus among sequences: charged (DEHKR) in blue; aromatic (FHWHY) in pink; polar (DEHKNQRSTY) in red; tiny (AGS) in light purple; small (ACDGNPSTV) in dark purple; and hydrophobic (ACLIVMHYFW) in yellow.

**Figure S2.** Absorption spectra of *BpeGReg* with ferric heme bound to various ligands. (a) Ferric ( $\text{Fe}^{\text{III}}$ ) *BpeGReg* in met- (dashed line) and the imidazole-bound (solid line) forms. (b) Ferric ( $\text{Fe}^{\text{III}}$ ) *BpeGReg* in met- (dashed line) and the cyanomet-bound (solid line) forms. All measurements were done at 25°C and pH 7.0 in 100 mM sodium phosphate buffers.

**Figure S3.** Association of oxygen to ferrous *BpeGReg* at 25°C and pH 7.0. (a) The association rate for binding of  $\text{O}_2$  to deoxy-*BpeGReg* was determined from examinations of  $\text{O}_2$  rebinding to deoxy protein produced from laser-flash photolysis of the  $\text{O}_2$ -bound form. Each  $K_{\text{obs}}$  represents the average of six measurements of the rate of *BpeGReg* association at a given concentration of  $\text{O}_2$ . (b) The kinetic traces for binding of *BpeGReg* to 64, 256, and 1024  $\mu\text{M}$   $\text{O}_2$  (red), along with the single-exponential fits that yielded the  $K_{\text{obs}}$  values (black).

**Figure S4.** Absorption spectrum of met-*BpeGReg* H225A. Met-*BpeGReg* H225A shows the same absorption spectrum as met-*BpeGReg*, indicating that *BpeGReg* H225A binds heme. All measurements were done at 25°C and pH 8.0 in 50 mM sodium phosphate buffers.

**Figure S5.** Characterization of *AvGReg* from *A. vinelandii* and *CvGReg* from *C. violaceum*. (a) SDS-PAGE of purified *AvGReg* and *CvGReg*. Lane 1, molecular weight marker; lane 2, *AvGReg*<sub>6x-His</sub>; lane 3, *CvGReg*<sub>6x-His</sub>. Absorption spectrum of (b) *AvGReg* and (c) *CvGReg*. Solid line, oxygen-bound form; dotted line, deoxy-form; dashed line, oxy-form. (d-f) Phenotypes of *S. typhimurium* cells expressing *AvGReg* and *CvGReg*. (d) rdar morphotype development on Congo red plates. (e) Swimming motility on 0.3% tryptone agar plates. (f) Biofilm formation in liquid culture.

Diagram of protein domain structure with regions Z, A, B, C, E, F, G. HemAT-Bs PleD sequence alignment from 1 to 142. Species include Shigella dysenteriae, Shigella flexneri, Shigella sonnei, Escherichia coli, Erwinia carotovora, Bordetella bronchiseptica, Bordetella pertussis, Shewanella putrefaciens, Shewanella sp., Azotobacter vinelandii, Magnetococcus sp., and Chromobacterium violaceum.

Diagram of protein domain structure with region H. HemAT-Bs PleD sequence alignment from 142 to 197. Species include Shigella dysenteriae, Shigella flexneri, Shigella sonnei, Escherichia coli, Erwinia carotovora, Bordetella bronchiseptica, Bordetella pertussis, Shewanella putrefaciens, Shewanella sp., Azotobacter vinelandii, Magnetococcus sp., and Chromobacterium violaceum.

Diagram of protein domain structure with regions β0, α0, β1, α1, α2, β2, β3, α3, β3', β3''. HemAT-Bs PleD sequence alignment from 197 to 318. Species include Shigella dysenteriae, Shigella flexneri, Shigella sonnei, Escherichia coli, Erwinia carotovora, Bordetella bronchiseptica, Bordetella pertussis, Shewanella putrefaciens, Shewanella sp., Azotobacter vinelandii, Magnetococcus sp., and Chromobacterium violaceum.

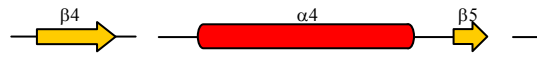

|                                             |                                                                                                                                                                                                                                                                                                                                                                                                                                                                                                                                                                                                                                           |     |
|---------------------------------------------|-------------------------------------------------------------------------------------------------------------------------------------------------------------------------------------------------------------------------------------------------------------------------------------------------------------------------------------------------------------------------------------------------------------------------------------------------------------------------------------------------------------------------------------------------------------------------------------------------------------------------------------------|-----|
| HemAT-Bs                                    | *****                                                                                                                                                                                                                                                                                                                                                                                                                                                                                                                                                                                                                                     | 186 |
| PleD                                        | <b>V</b> <b>T</b> <b>I</b> <b>S</b> <b>I</b> <b>G</b> <b>V</b> <b>S</b> <b>A</b> <b>T</b> A-- <b>G</b> <b>E</b> <b>G</b> <b>D</b> <b>T</b> <b>P</b> <b>E</b> <b>A</b> <b>L</b> <b>L</b> <b>K</b> <b>R</b> <b>A</b> <b>D</b> <b>E</b> <b>G</b> <b>V</b> <b>Y</b> <b>Q</b> <b>A</b> <b>K</b> <b>A</b> <b>S</b> <b>G</b> <b>R</b> <b>N</b> <b>A</b> <b>V</b> <b>V</b> <b>G</b> -- <b>K</b> <b>A</b> <b>L</b> .....                                                                                                                                                                                                                           | 454 |
| <i>Shigella dysenteriae</i> str. 1012       | .....                                                                                                                                                                                                                                                                                                                                                                                                                                                                                                                                                                                                                                     | 336 |
| <i>Shigella flexneri</i> 2a str. 301        | .....                                                                                                                                                                                                                                                                                                                                                                                                                                                                                                                                                                                                                                     | 381 |
| <i>Shigella sonnei</i> Ss046                | -- <b>S</b> <b>L</b> <b>S</b> <b>I</b> <b>G</b> <b>A</b> <b>A</b> <b>M</b> <b>F</b> <b>N</b> -- <b>G</b> <b>H</b> <b>P</b> <b>D</b> <b>Y</b> <b>E</b> <b>R</b> <b>L</b> <b>I</b> <b>Q</b> <b>I</b> <b>A</b> <b>D</b> <b>E</b> <b>A</b> <b>L</b> <b>Y</b> <b>I</b> <b>A</b> <b>K</b> <b>R</b> <b>G</b> <b>R</b> <b>N</b> <b>R</b> <b>V</b> <b>E</b> <b>L</b> <b>W</b> <b>K</b> <b>A</b> <b>S</b> <b>L</b> .....                                                                                                                                                                                                                            | 460 |
| <i>Escherichia coli</i> O157:H7 EDL933      | -- <b>S</b> <b>L</b> <b>S</b> <b>I</b> <b>G</b> <b>A</b> <b>A</b> <b>M</b> <b>F</b> <b>N</b> -- <b>G</b> <b>H</b> <b>P</b> <b>D</b> <b>Y</b> <b>E</b> <b>R</b> <b>L</b> <b>I</b> <b>Q</b> <b>I</b> <b>A</b> <b>D</b> <b>E</b> <b>A</b> <b>L</b> <b>Y</b> <b>I</b> <b>A</b> <b>K</b> <b>R</b> <b>G</b> <b>R</b> <b>N</b> <b>R</b> <b>V</b> <b>E</b> <b>L</b> <b>W</b> <b>K</b> <b>A</b> <b>S</b> <b>L</b> .....                                                                                                                                                                                                                            | 460 |
| <i>Escherichia coli</i> str. E110019        | -- <b>S</b> <b>L</b> <b>S</b> <b>I</b> <b>G</b> <b>A</b> <b>A</b> <b>M</b> <b>F</b> <b>N</b> -- <b>G</b> <b>H</b> <b>P</b> <b>D</b> <b>Y</b> <b>E</b> <b>R</b> <b>L</b> <b>I</b> <b>Q</b> <b>I</b> <b>A</b> <b>D</b> <b>E</b> <b>A</b> <b>L</b> <b>Y</b> <b>I</b> <b>A</b> <b>K</b> <b>R</b> <b>G</b> <b>R</b> <b>N</b> <b>R</b> <b>V</b> <b>E</b> <b>L</b> <b>W</b> <b>K</b> <b>A</b> <b>S</b> <b>L</b> .....                                                                                                                                                                                                                            | 453 |
| <i>Erwinia carotovora</i> subsp atroseptica | -- <b>T</b> <b>I</b> <b>S</b> <b>A</b> <b>G</b> <b>I</b> <b>A</b> <b>V</b> <b>S</b> -- <b>G</b> <b>H</b> <b>P</b> <b>D</b> <b>Y</b> <b>E</b> <b>C</b> <b>L</b> <b>I</b> <b>K</b> <b>A</b> <b>A</b> <b>D</b> <b>D</b> <b>A</b> <b>L</b> <b>Y</b> <b>Q</b> <b>A</b> <b>K</b> <b>A</b> <b>N</b> <b>G</b> <b>R</b> <b>N</b> <b>R</b> <b>I</b> <b>E</b> <b>Y</b> <b>A</b> <b>P</b> <b>E</b> .....                                                                                                                                                                                                                                              | 442 |
| <i>Bordetella bronchiseptica</i> RB50       | -- <b>T</b> <b>L</b> <b>S</b> <b>I</b> <b>G</b> <b>V</b> <b>A</b> <b>A</b> <b>H</b> <b>D</b> -- <b>R</b> <b>H</b> <b>P</b> <b>D</b> <b>Y</b> <b>Q</b> <b>R</b> <b>L</b> <b>L</b> <b>K</b> <b>R</b> <b>A</b> <b>D</b> <b>Q</b> <b>A</b> <b>L</b> <b>Y</b> <b>A</b> <b>A</b> <b>K</b> <b>S</b> <b>G</b> <b>G</b> <b>R</b> <b>N</b> <b>R</b> <b>C</b> <b>V</b> <b>L</b> <b>A</b> <b>N</b> <b>A</b> <b>G</b> <b>P</b> <b>A</b> <b>E</b> <b>P</b> <b>S</b> <b>Q</b> <b>R</b> <b>P</b> <b>D</b> <b>A</b> <b>V</b> <b>A</b> <b>Q</b> <b>S</b> <b>G</b> <b>Q</b> <b>H</b> .....                                                                   | 475 |
| <i>Bordetella pertussis</i> Tohama I        | -- <b>T</b> <b>L</b> <b>S</b> <b>I</b> <b>G</b> <b>V</b> <b>A</b> <b>A</b> <b>H</b> <b>D</b> -- <b>R</b> <b>H</b> <b>P</b> <b>D</b> <b>Y</b> <b>Q</b> <b>R</b> <b>L</b> <b>L</b> <b>K</b> <b>R</b> <b>A</b> <b>D</b> <b>Q</b> <b>A</b> <b>L</b> <b>Y</b> <b>A</b> <b>A</b> <b>K</b> <b>S</b> <b>G</b> <b>G</b> <b>R</b> <b>N</b> <b>R</b> <b>C</b> <b>V</b> <b>L</b> <b>A</b> <b>N</b> <b>A</b> <b>G</b> <b>P</b> <b>A</b> <b>E</b> <b>P</b> <b>S</b> <b>Q</b> <b>R</b> <b>P</b> <b>D</b> <b>A</b> <b>V</b> <b>A</b> <b>Q</b> <b>S</b> <b>G</b> <b>Q</b> <b>H</b> .....                                                                   | 475 |
| <i>Bordetella parapertussis</i> 12822       | -- <b>T</b> <b>L</b> <b>S</b> <b>I</b> <b>G</b> <b>V</b> <b>A</b> <b>A</b> <b>H</b> <b>D</b> -- <b>R</b> <b>H</b> <b>P</b> <b>D</b> <b>Y</b> <b>Q</b> <b>R</b> <b>L</b> <b>L</b> <b>K</b> <b>R</b> <b>A</b> <b>D</b> <b>Q</b> <b>A</b> <b>L</b> <b>Y</b> <b>A</b> <b>A</b> <b>K</b> <b>P</b> <b>G</b> <b>G</b> <b>R</b> <b>N</b> <b>R</b> <b>C</b> <b>V</b> <b>L</b> <b>A</b> <b>N</b> <b>A</b> <b>G</b> <b>P</b> <b>A</b> <b>E</b> <b>P</b> <b>S</b> <b>Q</b> <b>R</b> <b>P</b> <b>D</b> <b>A</b> <b>V</b> <b>S</b> <b>Q</b> <b>S</b> <b>G</b> <b>Q</b> <b>H</b> .....                                                                   | 475 |
| <i>Shewanella putrefaciens</i> CN-32        | -- <b>T</b> <b>V</b> <b>S</b> <b>I</b> <b>G</b> <b>L</b> <b>A</b> <b>M</b> <b>Y</b> <b>D</b> -- <b>G</b> <b>H</b> <b>P</b> <b>D</b> <b>Y</b> <b>Q</b> <b>R</b> <b>C</b> <b>L</b> <b>R</b> <b>A</b> <b>A</b> <b>D</b> <b>A</b> <b>L</b> <b>F</b> <b>A</b> <b>A</b> <b>K</b> <b>R</b> <b>A</b> <b>G</b> <b>R</b> <b>N</b> <b>C</b> <b>I</b> <b>I</b> <b>T</b> <b>A</b> <b>I</b> <b>D</b> <b>K</b> <b>A</b> <b>D</b> <b>S</b> .....                                                                                                                                                                                                          | 454 |
| <i>Shewanella</i> sp. W3-18-1               | -- <b>T</b> <b>V</b> <b>S</b> <b>I</b> <b>G</b> <b>L</b> <b>A</b> <b>M</b> <b>Y</b> <b>D</b> -- <b>G</b> <b>H</b> <b>P</b> <b>D</b> <b>Y</b> <b>Q</b> <b>R</b> <b>C</b> <b>L</b> <b>R</b> <b>A</b> <b>A</b> <b>D</b> <b>A</b> <b>L</b> <b>F</b> <b>A</b> <b>A</b> <b>K</b> <b>R</b> <b>A</b> <b>G</b> <b>R</b> <b>N</b> <b>C</b> <b>I</b> <b>I</b> <b>T</b> <b>A</b> <b>I</b> <b>D</b> <b>K</b> <b>A</b> <b>D</b> <b>S</b> .....                                                                                                                                                                                                          | 454 |
| <i>Azotobacter vinelandii</i> AvOP          | -- <b>T</b> <b>V</b> <b>S</b> <b>I</b> <b>G</b> <b>V</b> <b>A</b> <b>L</b> <b>H</b> <b>D</b> -- <b>G</b> <b>H</b> <b>P</b> <b>D</b> <b>Y</b> <b>Q</b> <b>H</b> <b>L</b> <b>L</b> <b>Q</b> <b>A</b> <b>D</b> <b>R</b> <b>A</b> <b>L</b> <b>Y</b> <b>E</b> <b>A</b> <b>K</b> <b>H</b> <b>G</b> <b>G</b> <b>R</b> <b>N</b> <b>Q</b> <b>V</b> <b>V</b> <b>L</b> <b>A</b> <b>R</b> -- <b>K</b> <b>L</b> <b>D</b> <b>G</b> .....                                                                                                                                                                                                                | 464 |
| <i>Magnetococcus</i> sp. MC-1               | -- <b>T</b> <b>A</b> <b>S</b> <b>F</b> <b>G</b> <b>G</b> <b>A</b> <b>V</b> <b>H</b> <b>D</b> -- <b>G</b> <b>N</b> <b>P</b> <b>N</b> <b>F</b> <b>H</b> <b>K</b> <b>T</b> <b>L</b> <b>K</b> <b>L</b> <b>T</b> <b>D</b> <b>E</b> <b>A</b> <b>L</b> <b>Y</b> <b>E</b> <b>A</b> <b>K</b> <b>H</b> <b>S</b> <b>G</b> <b>R</b> <b>N</b> <b>R</b> <b>C</b> <b>I</b> <b>I</b> <b>R</b> <b>A</b> .....                                                                                                                                                                                                                                              | 453 |
| <i>Chromobacterium violaceum</i> ATCC 12472 | ----- <b>S</b> <b>E</b> <b>T</b> <b>G</b> <b>F</b> <b>D</b> <b>D</b> <b>F</b> <b>V</b> <b>L</b> <b>P</b> <b>E</b> <b>L</b> <b>L</b> <b>G</b> <b>K</b> <b>A</b> <b>D</b> <b>Q</b> <b>R</b> <b>M</b> <b>Y</b> <b>E</b> <b>M</b> <b>K</b> <b>Q</b> <b>R</b> <b>H</b> <b>R</b> <b>M</b> <b>D</b> <b>P</b> <b>A</b> <b>A</b> <b>G</b> <b>P</b> <b>G</b> <b>K</b> <b>A</b> <b>D</b> <b>E</b> <b>K</b> <b>A</b> <b>S</b> <b>E</b> <b>D</b> <b>A</b> <b>F</b> <b>V</b> <b>V</b> <b>G</b> <b>R</b> .....                                                                                                                                           | 375 |
| EAK60420.1                                  | ----- <b>V</b> <b>Q</b> <b>T</b> <b>G</b> <b>F</b> <b>V</b> <b>Q</b> <b>F</b> <b>D</b> <b>E</b> <b>G</b> <b>N</b> <b>S</b> <b>L</b> <b>I</b> <b>R</b> <b>L</b> <b>A</b> <b>D</b> <b>E</b> <b>R</b> <b>M</b> <b>Y</b> <b>A</b> <b>A</b> <b>K</b> <b>K</b> <b>A</b> <b>M</b> <b>K</b> <b>Q</b> <b>V</b> <b>N</b> <b>Q</b> <b>N</b> <b>S</b> <b>T</b> <b>H</b> .....                                                                                                                                                                                                                                                                         | 360 |
| EAJ19547.1                                  | <b>I</b> <b>S</b> <b>L</b> <b>S</b> <b>F</b> <b>G</b> <b>I</b> <b>V</b> <b>D</b> <b>T</b> <b>G</b> <b>F</b> <b>Y</b> <b>D</b> <b>D</b> <b>A</b> <b>N</b> <b>L</b> <b>I</b> <b>H</b> <b>K</b> <b>A</b> <b>D</b> <b>Q</b> <b>K</b> <b>M</b> <b>S</b> <b>Y</b> <b>K</b> <b>R</b> <b>A</b> <b>R</b> <b>A</b> <b>A</b> <b>K</b> <b>S</b> <b>Q</b> <b>L</b> <b>P</b> <b>A</b> <b>M</b> <b>A</b> <b>A</b> <b>N</b> <b>D</b> <b>L</b> <b>K</b> <b>T</b> <b>E</b> <b>M</b> <b>N</b> <b>I</b> <b>E</b> <b>T</b> <b>L</b> <b>N</b> <b>L</b> <b>D</b> <b>I</b> <b>E</b> .....                                                                         | 353 |
| <i>Shewanella</i> sp. MR-4                  | <b>I</b> <b>S</b> <b>L</b> <b>S</b> <b>F</b> <b>G</b> <b>I</b> <b>V</b> <b>D</b> <b>T</b> <b>G</b> <b>F</b> <b>Y</b> <b>D</b> <b>D</b> <b>A</b> <b>N</b> <b>T</b> <b>L</b> <b>I</b> <b>H</b> <b>K</b> <b>A</b> <b>D</b> <b>Q</b> <b>K</b> <b>M</b> <b>S</b> <b>Y</b> <b>K</b> <b>R</b> <b>A</b> <b>R</b> <b>A</b> <b>A</b> <b>K</b> <b>S</b> <b>Q</b> <b>L</b> <b>P</b> <b>A</b> <b>T</b> <b>A</b> <b>A</b> <b>N</b> <b>D</b> <b>L</b> <b>K</b> <b>T</b> <b>E</b> <b>M</b> <b>S</b> <b>N</b> <b>I</b> <b>E</b> <b>T</b> <b>L</b> <b>N</b> <b>L</b> <b>D</b> <b>A</b> <b>E</b> .....                                                       | 397 |
| <i>Shewanella</i> sp. MR-7                  | <b>I</b> <b>S</b> <b>L</b> <b>S</b> <b>F</b> <b>G</b> <b>I</b> <b>V</b> <b>D</b> <b>T</b> <b>G</b> <b>F</b> <b>Y</b> <b>D</b> <b>D</b> <b>A</b> <b>N</b> <b>T</b> <b>L</b> <b>I</b> <b>H</b> <b>K</b> <b>A</b> <b>D</b> <b>Q</b> <b>K</b> <b>M</b> <b>S</b> <b>Y</b> <b>K</b> <b>R</b> <b>A</b> <b>R</b> <b>A</b> <b>A</b> <b>K</b> <b>S</b> <b>Q</b> <b>L</b> <b>P</b> <b>A</b> <b>T</b> <b>A</b> <b>A</b> <b>N</b> <b>D</b> <b>L</b> <b>K</b> <b>T</b> <b>E</b> <b>M</b> <b>N</b> <b>I</b> <b>E</b> <b>T</b> <b>L</b> <b>N</b> <b>L</b> <b>D</b> <b>A</b> <b>E</b> .....                                                                | 397 |
| EAK35357.1                                  | <b>I</b> <b>S</b> <b>L</b> <b>S</b> <b>Y</b> <b>G</b> <b>I</b> <b>V</b> <b>D</b> <b>T</b> <b>G</b> <b>F</b> <b>Y</b> <b>D</b> <b>D</b> <b>A</b> <b>N</b> <b>T</b> <b>L</b> <b>I</b> <b>H</b> <b>K</b> <b>A</b> <b>D</b> <b>Q</b> <b>K</b> <b>M</b> <b>S</b> <b>Y</b> <b>K</b> <b>R</b> <b>A</b> <b>A</b> <b>K</b> <b>L</b> <b>Q</b> <b>Q</b> <b>G</b> <b>T</b> <b>V</b> <b>S</b> <b>M</b> <b>A</b> <b>A</b> <b>N</b> <b>D</b> <b>I</b> <b>K</b> <b>S</b> <b>D</b> <b>I</b> <b>P</b> <b>Q</b> <b>S</b> <b>A</b> <b>S</b> <b>Q</b> <b>V</b> <b>G</b> <b>T</b> <b>P</b> <b>Q</b> <b>T</b> <b>A</b> <b>I</b> <b>T</b> <b>P</b> <b>T</b> ..... | 403 |
| <i>Shewanella</i> sp. ANA-3                 | <b>I</b> <b>S</b> <b>L</b> <b>S</b> <b>Y</b> <b>G</b> <b>I</b> <b>V</b> <b>D</b> <b>T</b> <b>G</b> <b>F</b> <b>Y</b> <b>D</b> <b>D</b> <b>A</b> <b>N</b> <b>T</b> <b>L</b> <b>I</b> <b>H</b> <b>K</b> <b>A</b> <b>D</b> <b>Q</b> <b>K</b> <b>M</b> <b>S</b> <b>Y</b> <b>K</b> <b>R</b> <b>A</b> <b>A</b> <b>K</b> <b>L</b> <b>Q</b> <b>Q</b> <b>G</b> <b>S</b> <b>V</b> <b>S</b> <b>I</b> <b>A</b> <b>A</b> <b>N</b> <b>D</b> <b>I</b> <b>K</b> <b>S</b> <b>D</b> <b>M</b> <b>P</b> <b>Q</b> <b>S</b> <b>A</b> <b>S</b> <b>Q</b> <b>V</b> <b>G</b> <b>T</b> <b>P</b> <b>Q</b> <b>A</b> <b>I</b> <b>T</b> <b>P</b> <b>T</b> .....          | 403 |
| <i>Shewanella baltica</i> OS155             | <b>I</b> <b>S</b> <b>L</b> <b>S</b> <b>F</b> <b>G</b> <b>I</b> <b>I</b> <b>D</b> <b>T</b> <b>G</b> <b>F</b> <b>Y</b> <b>E</b> <b>E</b> <b>A</b> <b>N</b> <b>S</b> <b>L</b> <b>I</b> <b>H</b> <b>K</b> <b>A</b> <b>D</b> <b>Q</b> <b>R</b> <b>M</b> <b>S</b> <b>Y</b> <b>K</b> <b>R</b> <b>A</b> <b>S</b> <b>K</b> <b>Q</b> <b>Q</b> <b>Q</b> <b>T</b> <b>M</b> <b>A</b> <b>A</b> <b>A</b> <b>N</b> <b>D</b> <b>L</b> <b>V</b> <b>P</b> <b>E</b> <b>N</b> <b>S</b> <b>T</b> <b>A</b> <b>D</b> .....                                                                                                                                        | 303 |
| <i>Desulfotalea psychrophila</i> LSv54      | -- <b>E</b> <b>C</b> <b>S</b> <b>M</b> <b>G</b> <b>I</b> <b>A</b> <b>I</b> <b>S</b> <b>D</b> <b>T</b> <b>A</b> <b>N</b> <b>S</b> <b>H</b> <b>D</b> <b>A</b> <b>D</b> <b>T</b> <b>L</b> <b>V</b> <b>K</b> <b>E</b> <b>A</b> <b>D</b> <b>K</b> <b>A</b> <b>M</b> <b>Y</b> <b>E</b> <b>A</b> <b>K</b> <b>V</b> <b>G</b> <b>G</b> <b>F</b> <b>S</b> <b>L</b> <b>K</b> <b>I</b> <b>A</b> <b>E</b> <b>G</b> <b>F</b> .....                                                                                                                                                                                                                      | 363 |
|                                             | .....450.....460.....470.....480.....490.....500.....510.....                                                                                                                                                                                                                                                                                                                                                                                                                                                                                                                                                                             |     |

Fig. S1

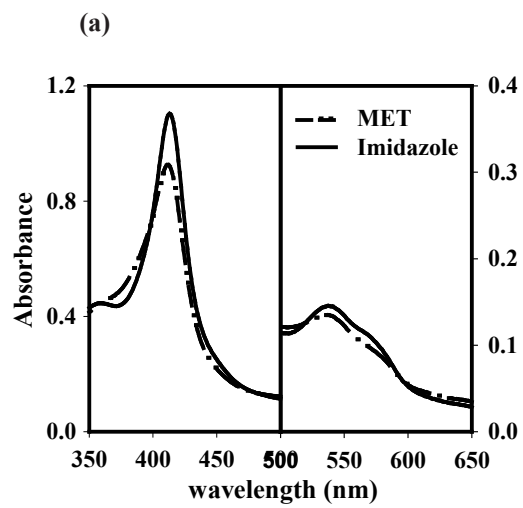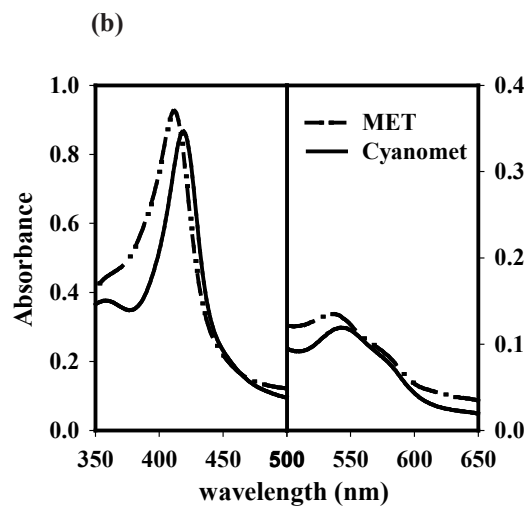

Fig. S2

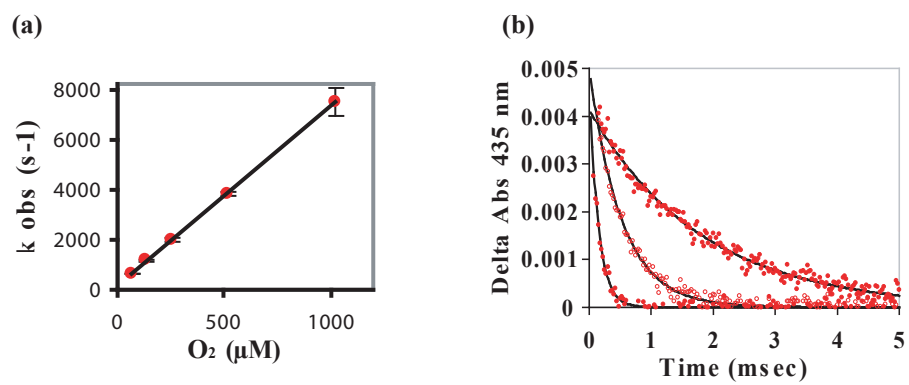

Fig. S3

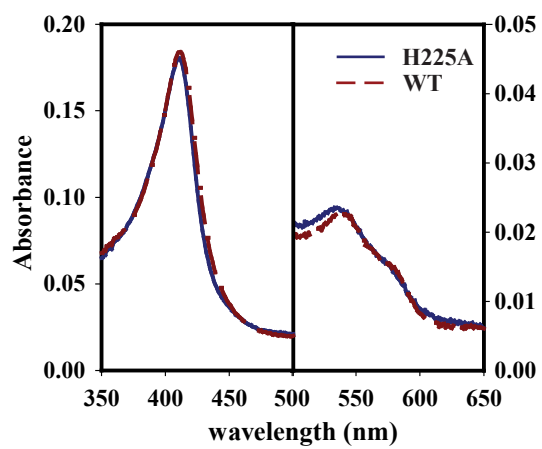

Fig. S4

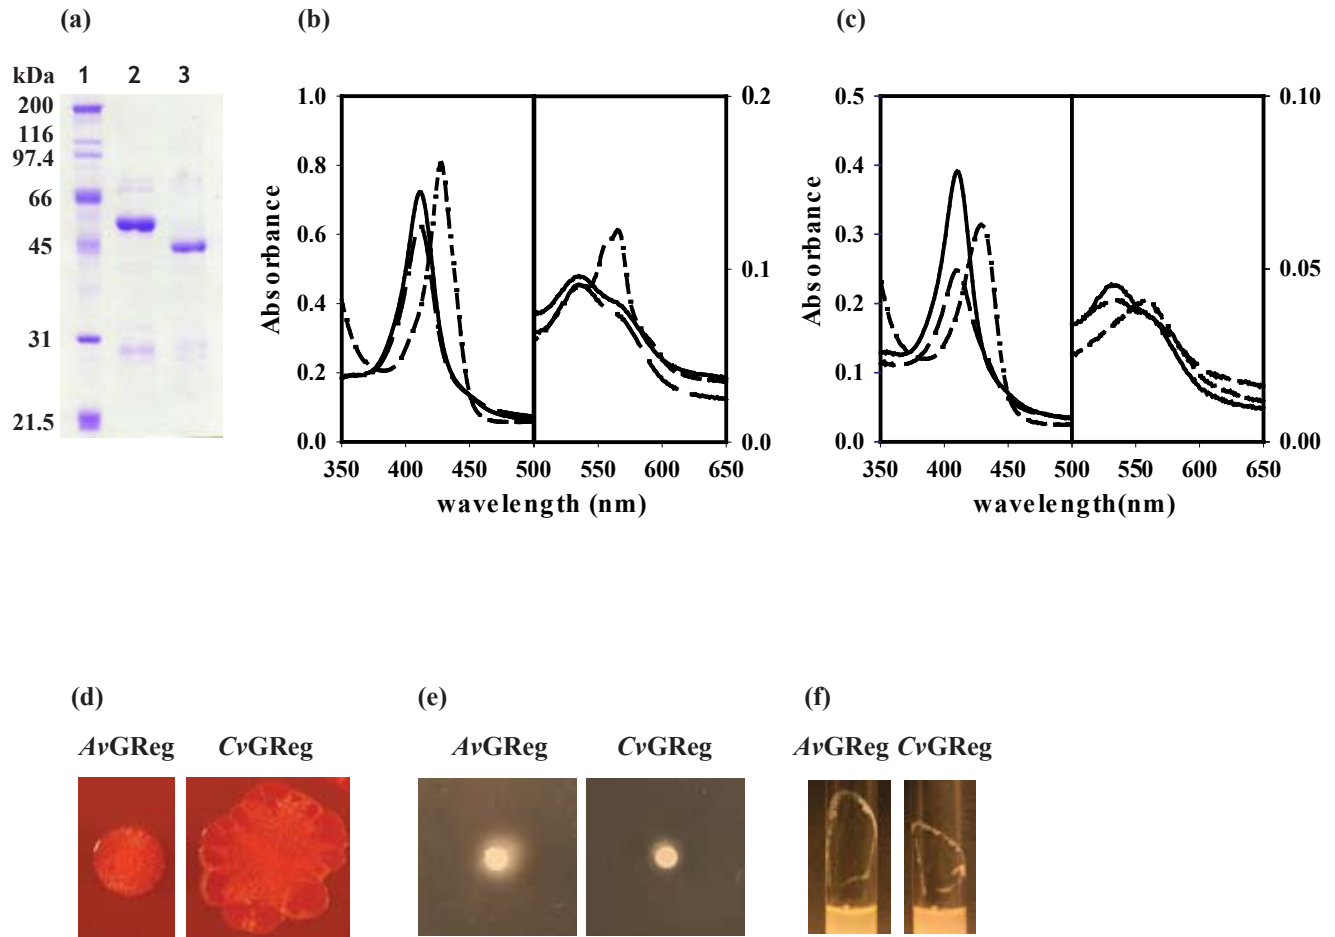

Fig. S5
